# Supplementary material for: Carbon nanotube–titanium dioxide nanocomposite support for improved activity and stability of an iridium catalyst toward the oxygen evolution reaction
Source: Royal Society of Chemistry journal article supplement (doi:10.1039/d2ra05027g), 2022-01-01
Supplement: d2ra05027g1.pdf [file d2ra05027g1.pdf]

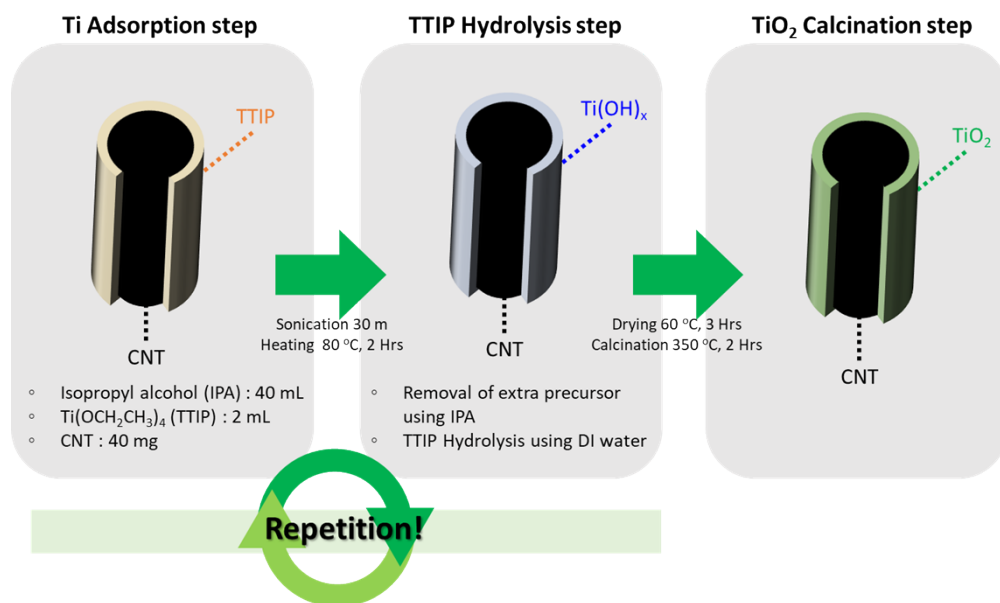

Figure S1. A schematic illustration of the layer-by-layer solution coating method to prepare CNT@TiO<sub>2</sub>.

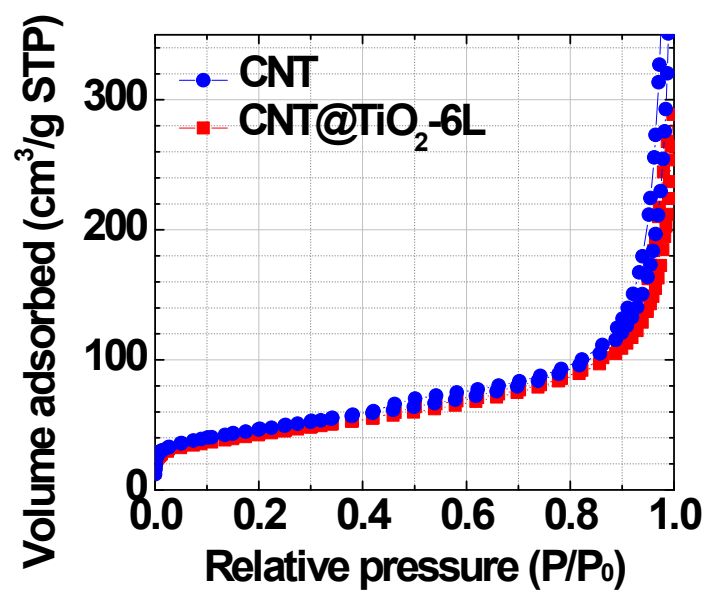

Figure S2. N<sub>2</sub> adsorption/desorption isotherms of CNT and CNT@TiO<sub>2</sub>.

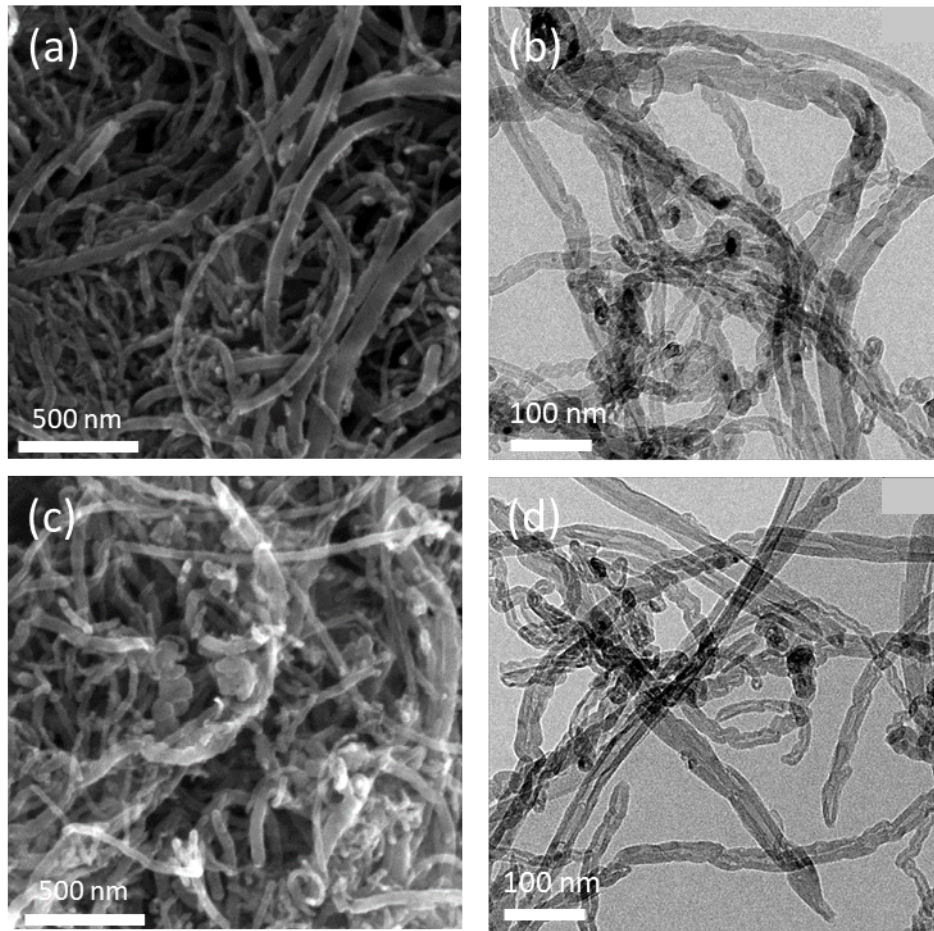

Figure S3. (a) SEM and (b) TEM images of as-purchased multiwall CNTs. (c) SEM and (d) TEM images of acid-treated CNTs.

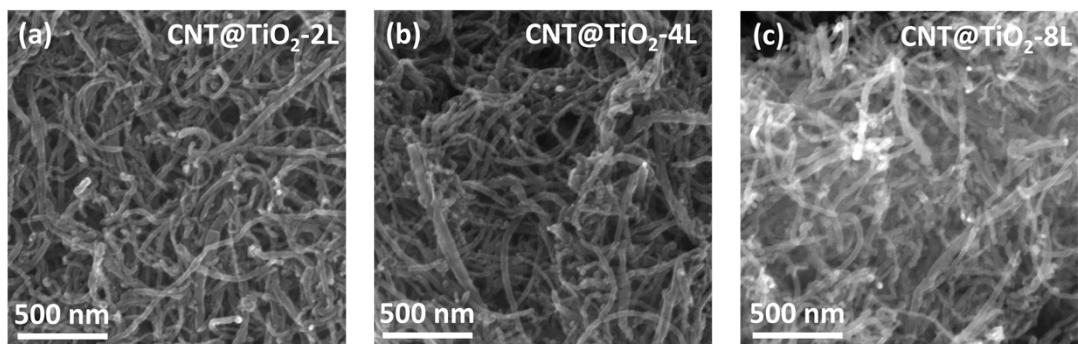

Figure S4. SEM images of (a) CNT@TiO<sub>2</sub>-2L, (b) CNT@TiO<sub>2</sub>-4L and (c) CNT@TiO<sub>2</sub>-8L nanocomposites.

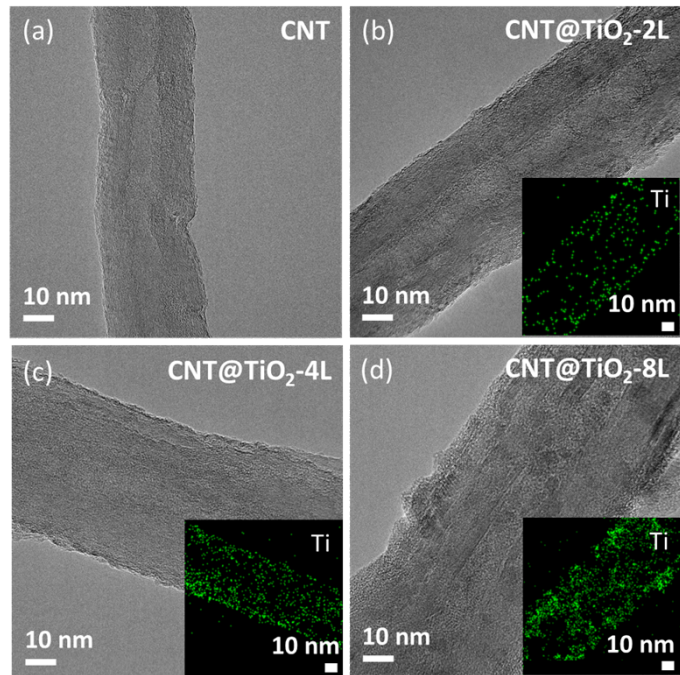

Figure S5. TEM images of (a) CNT, (b) CNT@TiO<sub>2</sub>-2L, (c) CNT@TiO<sub>2</sub>-4L and (d) CNT@TiO<sub>2</sub>-8L nanocomposites. Insets are EDS mapping images for Ti.

Table S1. Titanium (Ti) composition in CNT@TiO<sub>2</sub>-nL (n=2, 4, 6, and 8) nanocomposites measured using EDS.

| Sample name              | Ti (at.%) |
|--------------------------|-----------|
| CNT@TiO <sub>2</sub> -2L | 1.1       |
| CNT@TiO <sub>2</sub> -4L | 3.4       |
| CNT@TiO <sub>2</sub> -6L | 5.3       |
| CNT@TiO <sub>2</sub> -8L | 5.5       |

Table S2. Ir content in Ir/CNT and Ir/CNT@TiO<sub>2</sub>-nL (n=2, 4, 6, and 8) nanocomposites measured using ICP-MS.

| Sample name                 | Ir (wt.%) |
|-----------------------------|-----------|
| Ir/CNT                      | 38.8      |
| Ir/CNT@TiO <sub>2</sub> -2L | 39.2      |
| Ir/CNT@TiO <sub>2</sub> -4L | 39.4      |
| Ir/CNT@TiO <sub>2</sub> -6L | 39.3      |
| Ir/CNT@TiO <sub>2</sub> -8L | 38.6      |

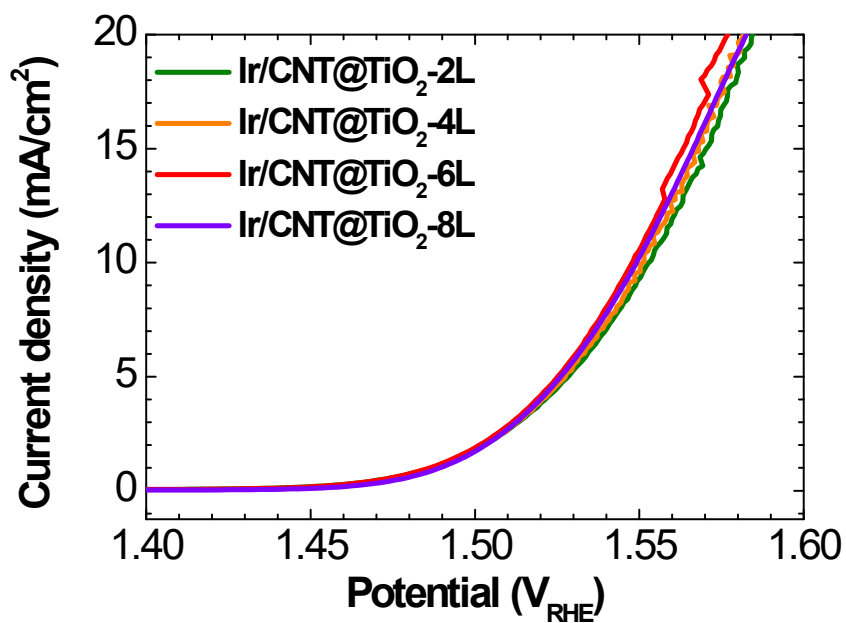

Figure S6. Polarization curve of Ir/CNT@TiO<sub>2</sub>-nL (n=2, 4, 6, and 8).

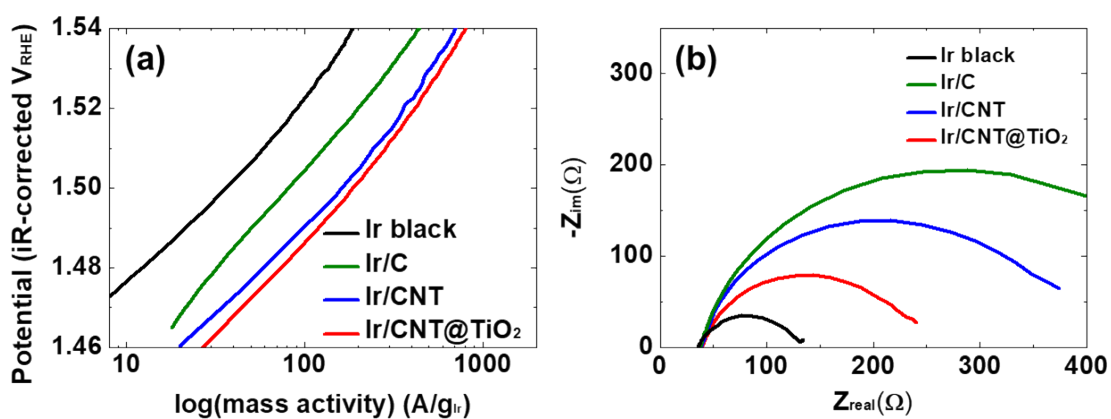

Figure S7. (a) Tafel plots and (b) Nyquist plots for Ir black, Ir/C, Ir/CNT and Ir/CNT@TiO<sub>2</sub>.

Table S3. OER mass activity of Ir/CNT@TiO<sub>2</sub> and previously-reported supported Ir-based catalysts measured in acidic media.

| Catalyst                               | Electrolyte                               | Activity ( $A g^{-1}_{Ir}$ ) |                  |                  | Reference        |
|----------------------------------------|-------------------------------------------|------------------------------|------------------|------------------|------------------|
|                                        |                                           | 1.525 V                      | 1.53 V           | 1.55 V           |                  |
| <b>Ir/CNT@TiO<sub>2</sub></b>          | <b>0.05 M H<sub>2</sub>SO<sub>4</sub></b> | <b>496</b>                   | <b>587</b>       | <b>1055</b>      | <b>This work</b> |
| Ir/ATO-10-NF                           | <b>0.05 M H<sub>2</sub>SO<sub>4</sub></b> |                              |                  | 1750             | <b>[1]</b>       |
| Ir/TiO <sub>2</sub> -MoO <sub>x</sub>  | 0.05 M H <sub>2</sub> SO <sub>4</sub>     |                              |                  | 573              | <b>[2]</b>       |
| IrO <sub>x</sub> /ATO <sup>b</sup>     | 0.05 M H <sub>2</sub> SO <sub>4</sub>     |                              | 100 <sup>a</sup> |                  | <b>[3]</b>       |
| IrO <sub>2</sub> /TiO <sub>2</sub>     | 0.1 M HClO <sub>4</sub>                   | 70                           |                  |                  | <b>[4]</b>       |
| IrO <sub>2</sub> /TiO <sub>2</sub>     | 0.1 M HClO <sub>4</sub>                   | 51                           |                  |                  | <b>[5]</b>       |
| IrO <sub>2</sub> /NbTiO <sub>2</sub>   | 0.1 M HClO <sub>4</sub>                   |                              |                  | 190 <sup>a</sup> | <b>[6]</b>       |
| IrO <sub>2</sub> /NbTiO <sub>2</sub>   | 0.5 M H <sub>2</sub> SO <sub>4</sub>      |                              |                  | 160 <sup>a</sup> | <b>[7]</b>       |
| IrRuO <sub>x</sub> /NbTiO <sub>2</sub> | 0.5 M H <sub>2</sub> SO <sub>4</sub>      |                              |                  | 570 <sup>a</sup> | <b>[8]</b>       |

<sup>a</sup> graph-derived values, <sup>b</sup> ATO(Antimony doped tin oxide)

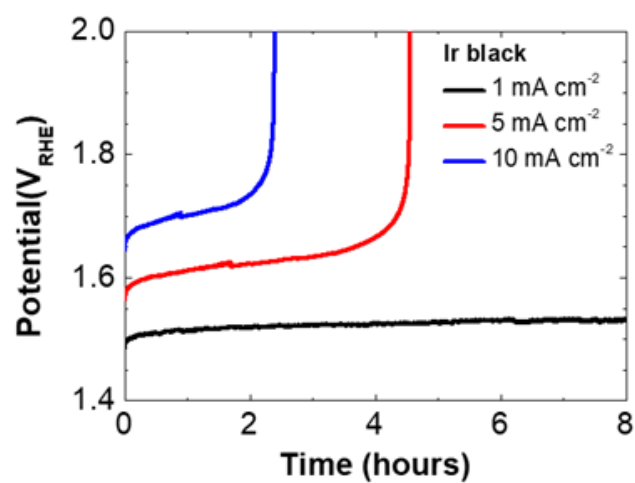

Figure S8. Chronopotentiometry curves of Ir black at 1, 5 and 10 mA cm<sup>-2</sup>. (Measurement conditions; 37.5 μg<sub>Ir</sub>·cm<sup>-2</sup>, Ar-saturated 0.05 M H<sub>2</sub>SO<sub>4</sub> solution, 1600 rpm, 25 °C)

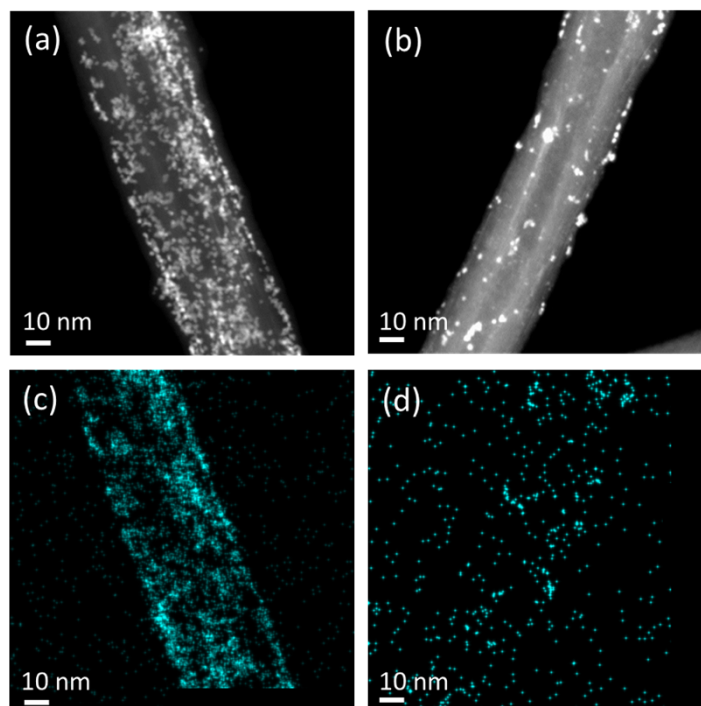

Figure S9. (a), (b) HAADF STEM images of Ir/CNT and (c), (d) EDS elemental mapping

image for Ir (a), (c) before and (b), (d) after the durability test.

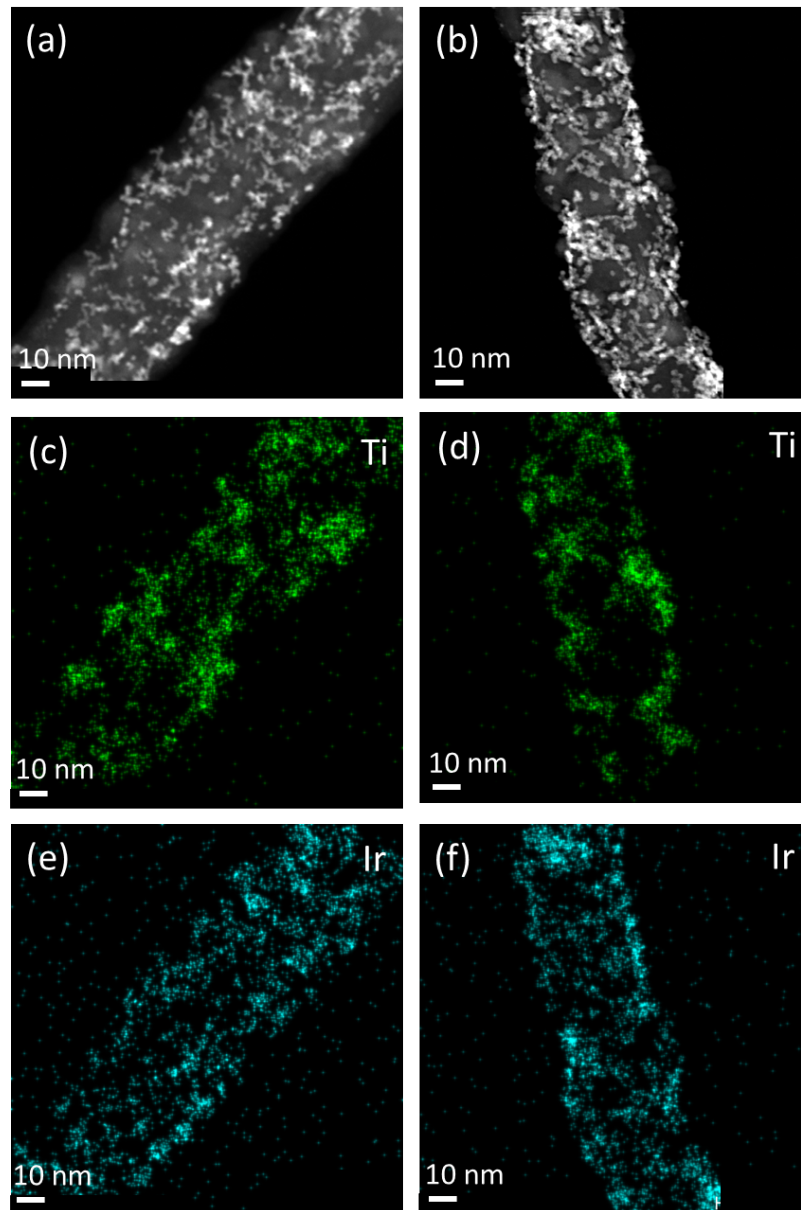

Figure S10. (a), (b) HAADF STEM images of Ir/CNT@TiO<sub>2</sub> and EDS elemental mapping image for (c), (d) Ti and (e), (f) Ir (a), (c), (e) before and (b), (d), (f) after the durability test.



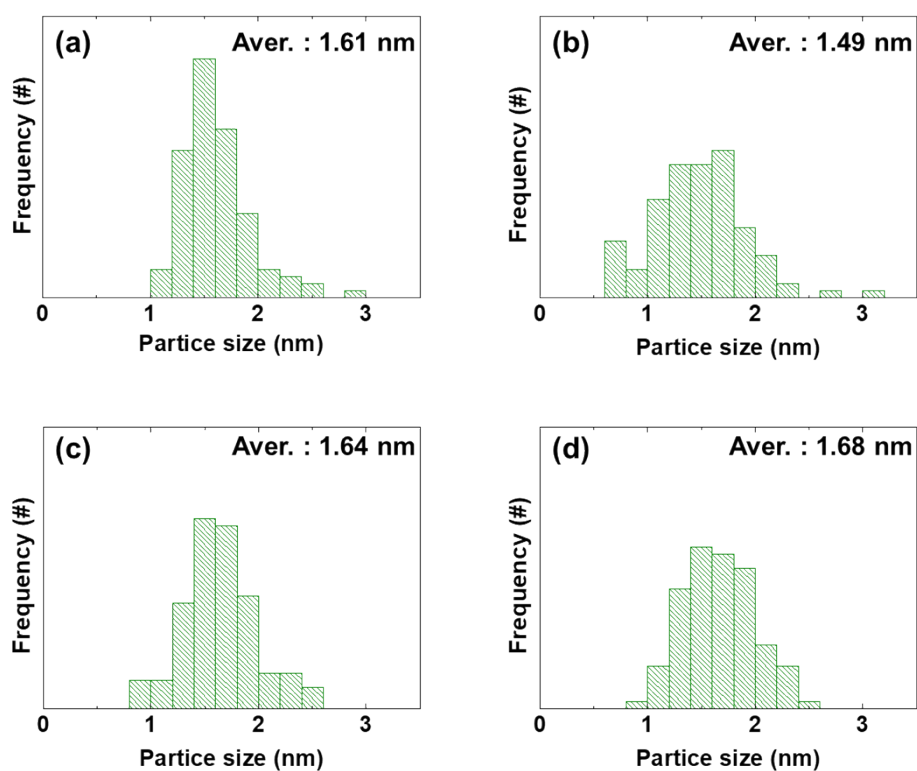

Figure S11. Particle size distribution of Ir nanoparticles of (a),(b) the Ir/CNT and (c),(d) the Ir/CNT@TiO<sub>2</sub> before and after the durability test.

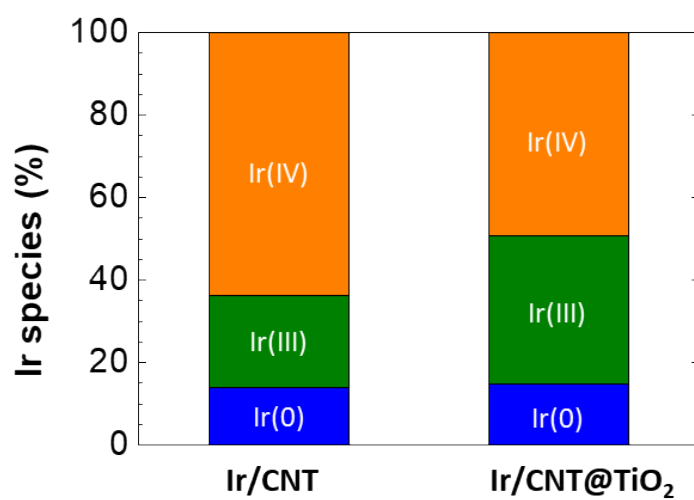

Figure S12. Composition of Ir species for Ir/CNT and Ir/CNT@TiO<sub>2</sub>

- [1] C. Daiane Ferreira da Silva, F. Claudel, V. Martin, R. Chattot, S. Abbou, K. Kumar, I. Jiménez-Morales, S. Cavaliere, D. Jones, J. Rozière, L. Solà-Hernandez, C. Beauger, M. Faustini, J. Peron, B. Gilles, T. Encinas, L. Piccolo, F.H. Barros de Lima, L. Dubau, F. Maillard, Oxygen Evolution Reaction Activity and Stability Benchmarks for Supported and Unsupported IrO<sub>x</sub> Electrocatalysts, *ACS Catalysis*, 11 (2021) 4107-4116.
- [2] E.-J. Kim, J. Shin, J. Bak, S.J. Lee, K. hyun Kim, D. Song, J. Roh, Y. Lee, H. Kim, K.-S. Lee, Stabilizing role of Mo in TiO<sub>2</sub>-MoO<sub>x</sub> supported Ir catalyst toward oxygen evolution reaction, *Applied Catalysis B: Environmental*, 280 (2021) 119433.
- [3] H.-S. Oh, H.N. Nong, T. Reier, A. Bergmann, M. Gliech, J. Ferreira de Araújo, E. Willinger, R. Schlögl, D. Teschner, P. Strasser, Electrochemical catalyst-support effects and their stabilizing role for IrO<sub>x</sub> nanoparticle catalysts during the oxygen evolution reaction, *Journal of the American Chemical Society*, 138 (2016) 12552-12563.
- [4] E. Oakton, D. Lebedev, M. Povia, D.F. Abbott, E. Fabbri, A. Fedorov, M. Nachtegaal, C. Copéret, T.J. Schmidt, IrO<sub>2</sub>-TiO<sub>2</sub>: A high-surface-area, active, and stable electrocatalyst for the oxygen evolution reaction, *Acs Catalysis*, 7 (2017) 2346-2352.
- [5] C. Van Pham, M. Bühler, J. Knöppel, M. Bierling, D. Seeberger, D. Escalera-López, K.J. Mayrhofer, S. Cherevko, S. Thiele, IrO<sub>2</sub> coated TiO<sub>2</sub> core-shell microparticles advance performance of low loading proton exchange membrane water electrolyzers, *Applied Catalysis B: Environmental*, 269 (2020) 118762.
- [6] C. Hao, H. Lv, C. Mi, Y. Song, J. Ma, Investigation of mesoporous niobium-doped TiO<sub>2</sub> as an oxygen evolution catalyst support in an SPE water electrolyzer, *ACS Sustainable Chemistry & Engineering*, 4 (2016) 746-756.
- [7] W. Hu, S. Chen, Q. Xia, IrO<sub>2</sub>/Nb-TiO<sub>2</sub> electrocatalyst for oxygen evolution reaction in acidic medium, *international journal of hydrogen energy*, 39 (2014) 6967-6976.
- [8] R.V. Genova-Koleva, F. Alcaide, G. Álvarez, P.L. Cabot, H.-J. Grande, M.V. Martínez-Huerta, O. Miguel, Supporting IrO<sub>2</sub> and IrRuO<sub>x</sub> nanoparticles on TiO<sub>2</sub> and Nb-doped TiO<sub>2</sub> nanotubes as electrocatalysts for the oxygen evolution reaction, *Journal of Energy Chemistry*, 34 (2019) 227-239.
